# Supplementary material
Source: Springer Nature journal article supplement (https://www.springermedizin.de/resource/supplementary/13075_2009_2777_MOESM7_ESM.pdf/9692860)

A

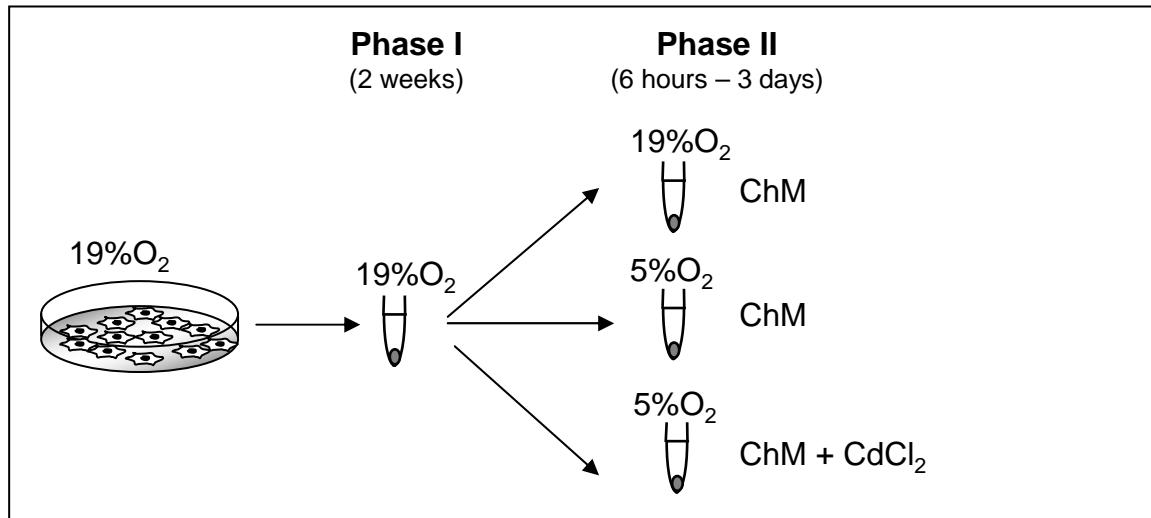

B

### Type II collagen mRNA expression

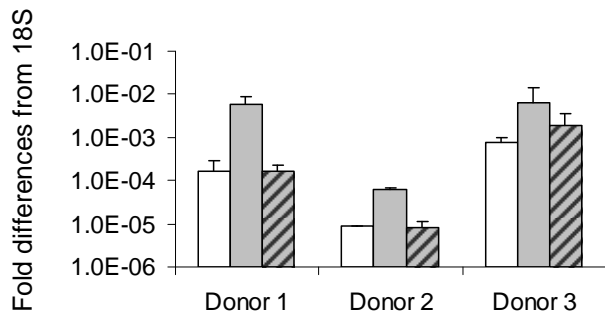

C

### MMP-1 mRNA expression

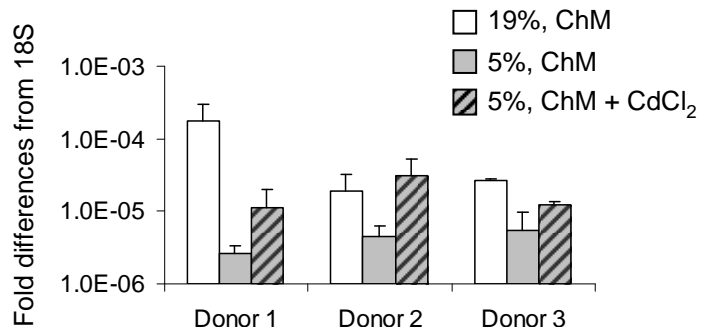

Supplement: MOESM7 [file 9692860]
